# Supplementary material for: Scaling down the size of BaLnF5nanocrystals (Ln = La, Gd, and Lu) with the Ln3+size
Source: Royal Society of Chemistry journal article supplement (doi:10.1039/c2dt31915b), 2012-10-22
Supplement: c2dt31915b.pdf [file c2dt31915b.pdf]

## Supplementary Information

### Scaling Down the Size of the BaLnF<sub>5</sub> (Ln = La, Gd, and Lu) Nanocrystals with the Ln<sup>3+</sup> Size

Shyam Sarkar,<sup>a</sup> Chanchal Hazra,<sup>a</sup> and Venkataramanan Mahalingam<sup>a\*</sup>

<sup>a</sup> *Department of Chemical Sciences, Indian Institute of Science Education and Research (IISER), Kolkata, Mohanpur, West Bengal, India.*

#### Experimental section

##### Chemicals and materials:

All the chemicals used in this work lanthanum oxide (La<sub>2</sub>O<sub>3</sub>, 99.99%), gadolinium oxide (Gd<sub>2</sub>O<sub>3</sub>, 99.99%), lutetium oxide (Lu<sub>2</sub>O<sub>3</sub>, 99.99%), ytterbium oxide (Yb<sub>2</sub>O<sub>3</sub>, 99.99%), erbium oxide (Er<sub>2</sub>O<sub>3</sub>, 99.99%), trifluoroacetic acid (CF<sub>3</sub>COOH, 99%), oleic acid (90%), 1-octadecene (90%) and barium acetylacetonate [Ba(acac)<sub>2</sub>, 99.99%], absolute ethanol were purchased from Sigma Aldrich. All the materials were used without further purification.

##### Preparation of BaLnF<sub>5</sub>:Yb<sup>3+</sup>(20%)/Er<sup>3+</sup>(2%)(Ln=La, Gd and Lu) nanocrystals:

Barium lanthanide fluoride, BaLnF<sub>5</sub> (Ln=La, Gd and Lu) nanocrystals doped with Yb<sup>3+</sup>(20%)/Er<sup>3+</sup>(2%)-ions were prepared by thermal decomposition method using oleic acid as capping agent and 1-octadecene as high boiling point solvent. Briefly, lanthanide trifluoroacetates were first prepared by refluxing stoichiometric amounts of corresponding lanthanide oxides (0.78 mmol of Ln<sub>2</sub>O<sub>3</sub>, Ln=La, Gd, Lu; 0.20 mmol of Yb<sub>2</sub>O<sub>3</sub> and 0.02 mmol of Er<sub>2</sub>O<sub>3</sub>) with 1:1 trifluoroacetic acid and water at 85<sup>o</sup>C and then evaporated at 65<sup>o</sup>C until dried completely. Then 2 mmol of Ba(acac)<sub>2</sub>, oleic acid (20 mL) and 1-octadecene (20 mL) were added to this dried precursors. Then the resulting mixture was first heated to 120<sup>o</sup>C under vacuum. After 15 minutes, the temperature of the mixture was raised to 330<sup>o</sup>C under an Argon flow. After leaving the reaction at this temperature for 2 h, the mixture was cooled to room temperature. Finally the nanocrystals were precipitated with absolute ethanol. The nanocrystals were separated by centrifugation and further purified by dispersing them with hexane followed by precipitation again with absolute ethanol. A 1 wt% colloidal dispersion was made by dispersing approximately 100 mg in roughly 10 mL of toluene.

### Characterization techniques:

The crystallinity and phase purity of the as prepared  $\text{BaLnF}_5$  (Ln=La, Gd, Lu) nanocrystals have been carried out by powder X-ray diffraction (XRD) measurements, using Rigaku-smartlab diffractometer with  $\text{Cu K}\alpha$  operating at 200kV and 45mA at a scanning rate of  $1^\circ \text{ min}^{-1}$  in the  $2\theta$  range from  $20^\circ$  to  $90^\circ$ . The morphology of the nanocrystals were characterized by transmission electron microscopy (TEM), using JEOL 2100 instrument. Thermogravimetric analysis (TGA) were done using Mettler Toledo TGA 851 instrument under  $\text{N}_2$  atmosphere at heating rate  $10^\circ \text{ min}^{-1}$ . The FTIR spectra were recorded using Perkin Elmer Spectrum RX1 spectrophotometer with the KBr disk technique in the range of  $400\text{-}4000\text{cm}^{-1}$ . The upconversion emission (UC) spectra were taken exciting the toluene dispersion of the nanocrystals using a 980 nm diode laser source from RGB Lase LLC, which was coupled with a fibre with core diameter of  $100 \mu\text{m}$ , was used to excite the samples. The output signal was measured with the Jobin Yvon Fluoromax-4 spectrometer.

**Table-1: Structural parameters of  $\text{Yb}^{3+}$ (20%)/ $\text{Er}^{3+}$ (2%)-doped  $\text{BaLnF}_5$  (Ln = La, Gd and Lu) nanocrystals.**

| Nanocrystals                                   | Crystalline phase | Crystallite size from XRD(nm) | Average size from TEM(nm) | Lattice constant ( $\text{\AA}$ )              |
|------------------------------------------------|-------------------|-------------------------------|---------------------------|------------------------------------------------|
| $\text{BaLaF}_5:\text{Yb}^{3+}/\text{Er}^{3+}$ | Cubic             | 12.56                         | ~12                       | a = b = c = 11.0750<br>PDF card No-00-046-0039 |
| $\text{BaGdF}_5:\text{Yb}^{3+}/\text{Er}^{3+}$ | Cubic             | 8.62                          | ~8                        | a = b = c = 6.9557<br>PDF card No-00-024-0098  |
| $\text{BaLuF}_5:\text{Yb}^{3+}/\text{Er}^{3+}$ | Cubic             | 2.54                          | ~3                        | a = b = c = 6.0230<br>PDF card No-01-072-3546  |

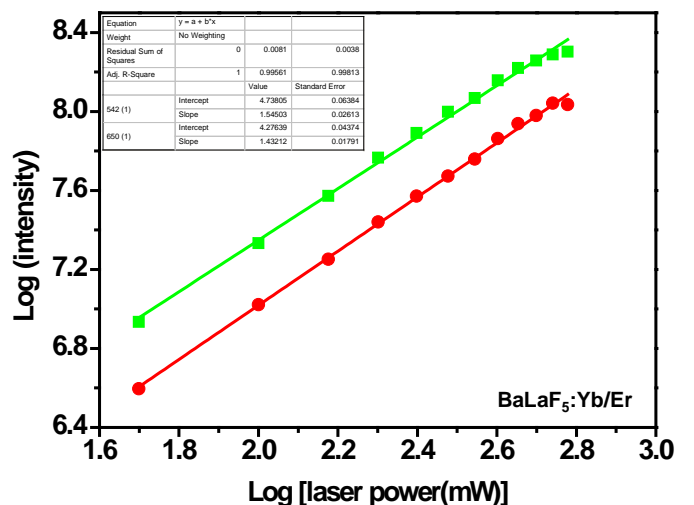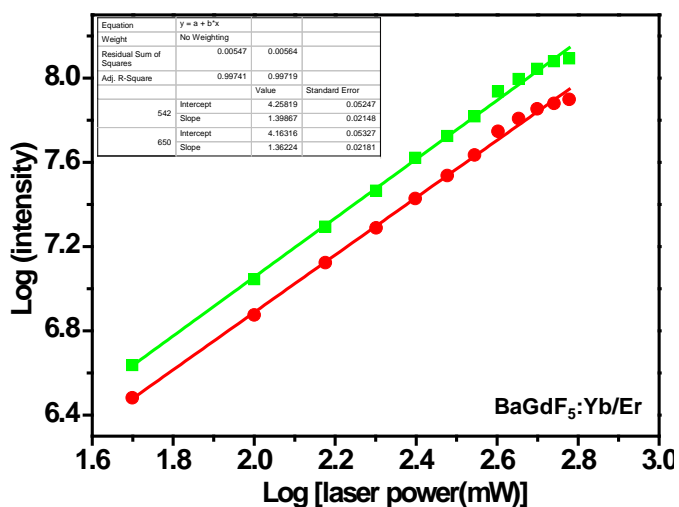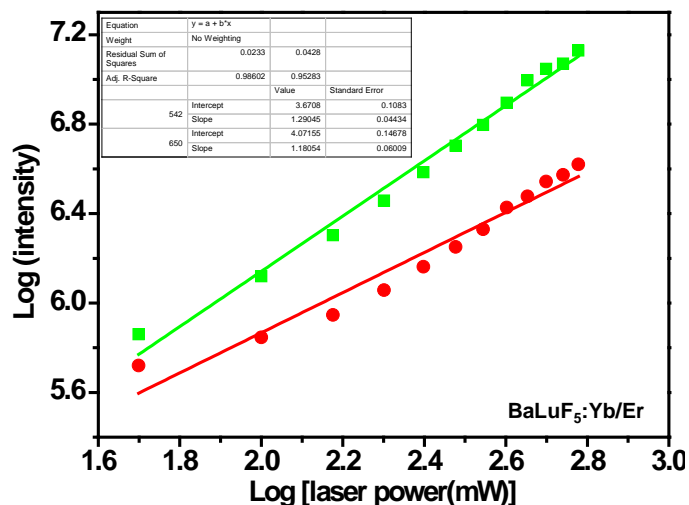

**Fig. S1:** The logarithmic plots of upconversion emission intensity verses the laser power of Yb<sup>3+</sup>(20%)/Er<sup>3+</sup>(2%)-doped BaLnF<sub>5</sub> (Ln = La, Gd, Lu) for 545 nm and 650 nm emissions.

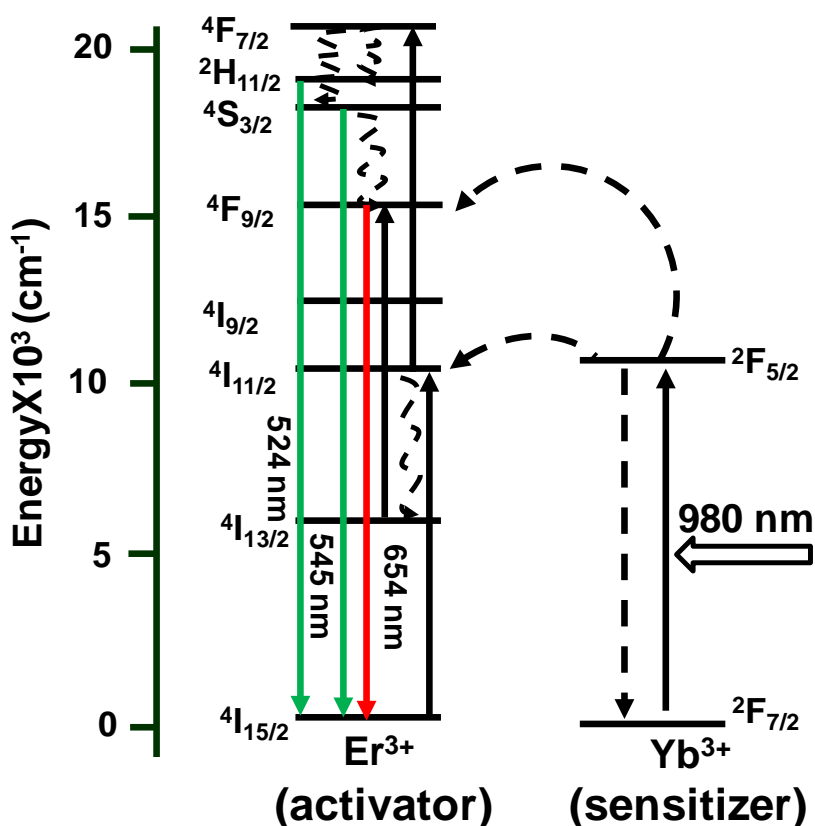

**Fig. S2:** Probable energy transfer mechanism between  $\text{Yb}^{3+}$  and  $\text{Er}^{3+}$  via the upconversion processes.

In the above mechanism,  $\text{Yb}^{3+}$  ions act as a sensitizer and  $\text{Er}^{3+}$  ion as an activator in the upconversion process. Under the 980 nm laser excitation electron transferred from the ground state ( $^2\text{F}_{7/2}$ ) of  $\text{Yb}^{3+}$  ion to its excited state,  $^2\text{F}_{5/2}$ , and the subsequently this energy transfer is transferred from  $\text{Yb}^{3+} (^2\text{F}_{5/2})$  to  $\text{Er}^{3+} (^4\text{I}_{11/2})$  energy level. This happens as these levels are closer in energy. A further excitation of electron from  $\text{Er}^{3+} (^4\text{I}_{11/2})$  to the  $\text{Er}^{3+} (^4\text{F}_{7/2})$  occurs via second energy transfer from  $\text{Yb}^{3+} (^2\text{F}_{5/2})$  level. The excited electrons decay first non-radiatively to  $^2\text{H}_{11/2}$ ,  $^4\text{S}_{3/2}$  and  $^4\text{F}_{9/2}$  energy levels and then radiatively decay to the ground state ( $^4\text{I}_{15/2}$ ) of  $\text{Er}^{3+}$  ion releasing green and red emissions, respectively.
